# Supplementary material for: 3D printing of Rg3-loaded hydrogel scaffolds: anti-inflammatory and scar-formation related collagen inhibitory effects for scar-free wound healing
Source: Royal Society of Chemistry journal article supplement (doi:10.1039/d3tb02941g), 2024-01-01
Supplement: d3tb02941g1.pdf [file d3tb02941g1.pdf]

## Supplementary Materials

# 3D Printing of Rg3-Loaded Hydrogel Scaffolds: Anti-Inflammatory and Scar-Formation Related Collagen Inhibitory Effects for Scar-Free Wound Healing

*Xusen Wang<sup>a‡</sup>, Pengyu Wei<sup>a‡</sup>, Cewen Hu<sup>a</sup>, Huajing Zeng<sup>a</sup>, Zengjie Fan<sup>a\*</sup>*

a. Key Laboratory of Dental Maxillofacial Reconstruction and Biological Intelligence

Manufacturing of Gansu Province, School of Stomatology, Lanzhou University,

Lanzhou 730000, People's Republic of China

‡The first two authors contributed equally to this work and should be considered co-first authors.

\*Corresponding author: [zjfan@lzu.edu.cn](mailto:zjfan@lzu.edu.cn).

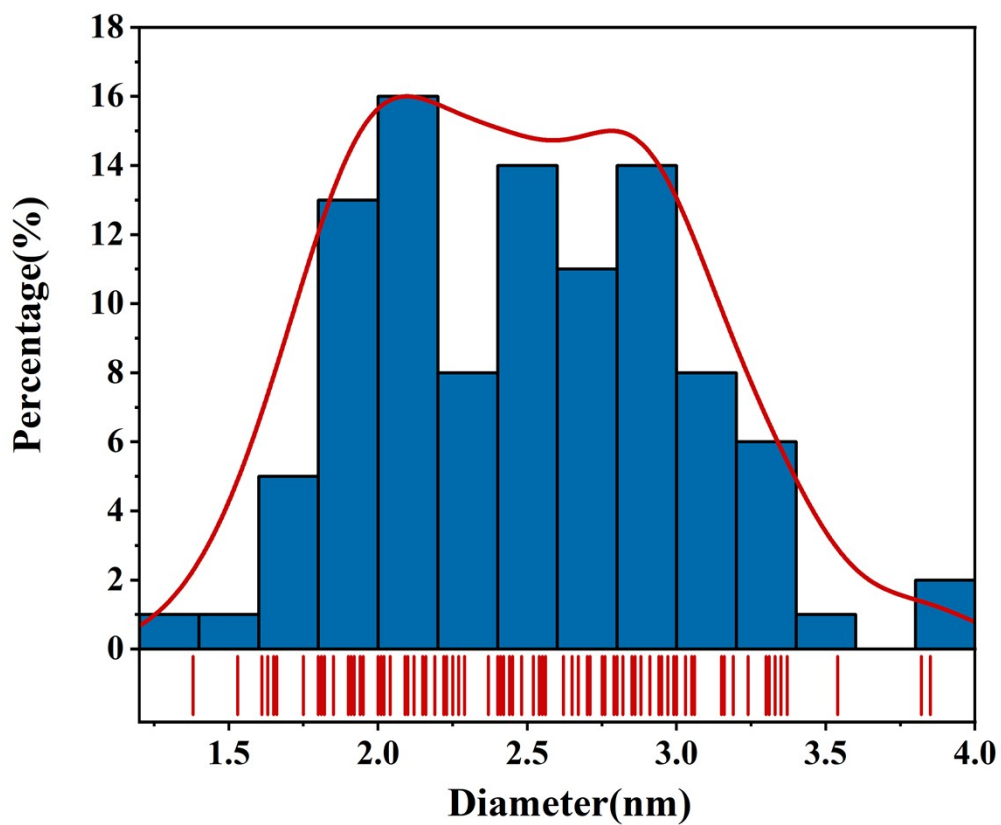

**Figure S1.** Particle size analysis graph of MSN using Nano Measure software and the statistical results showed that the average particle size was 2.47 nm.

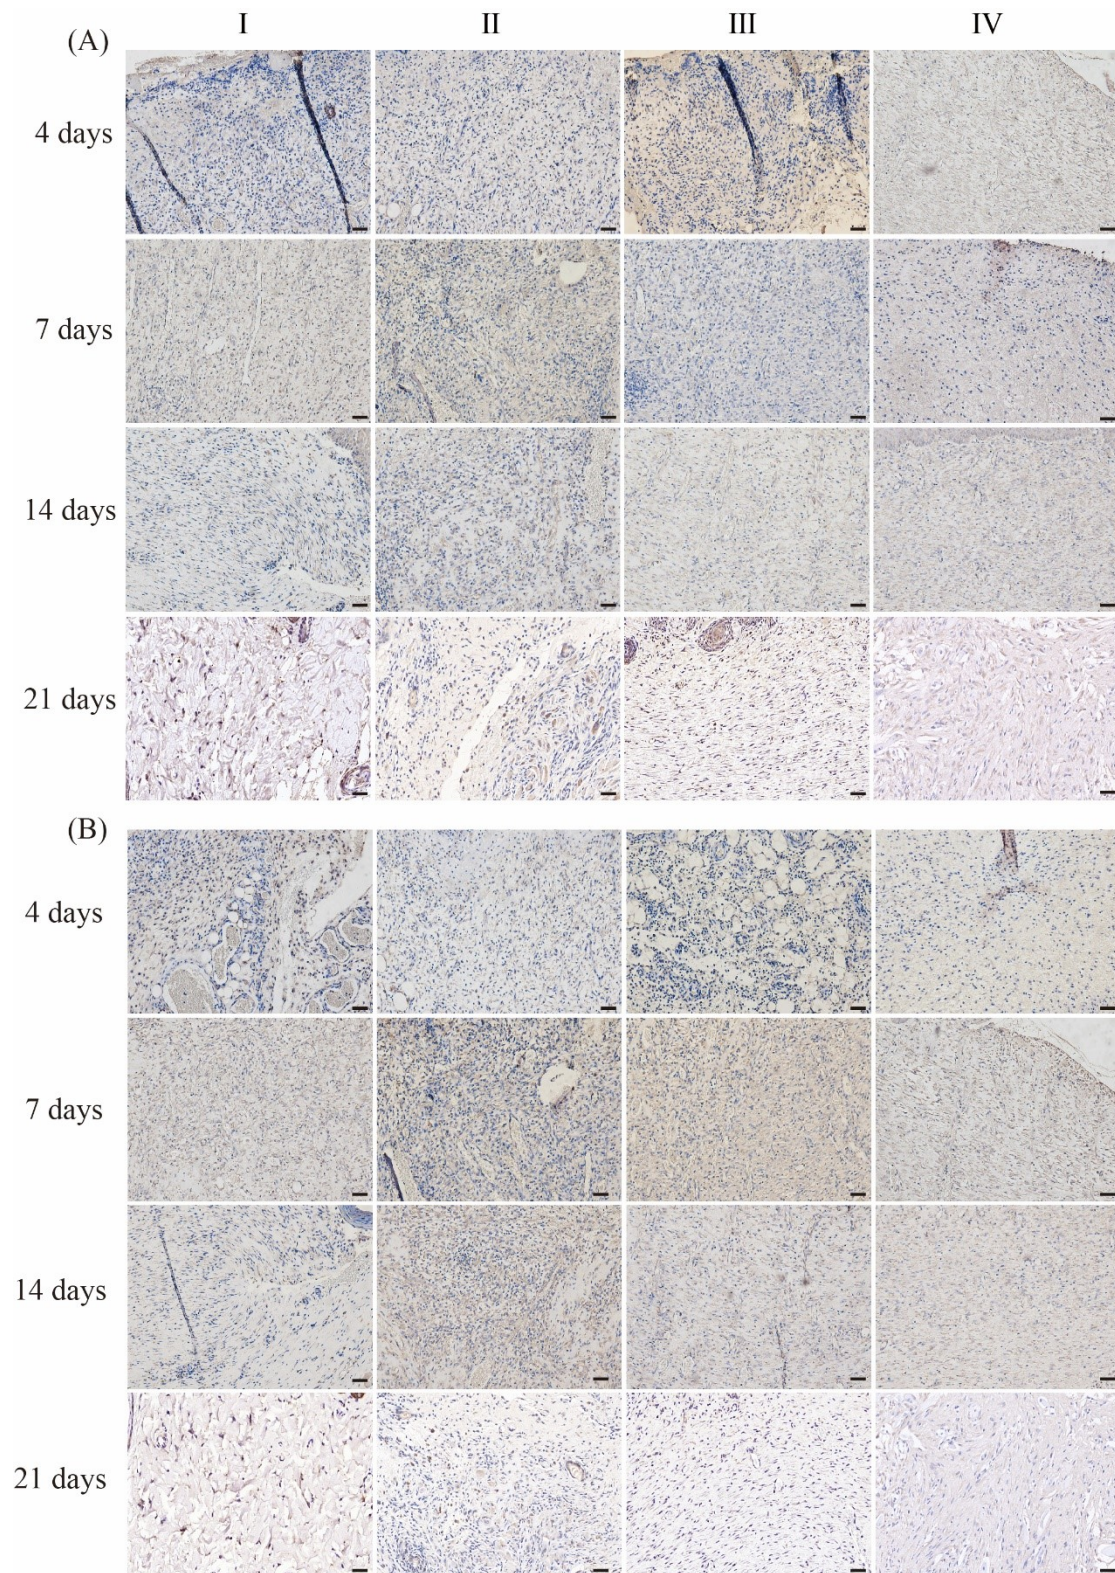

**Figure S2.** Representative immunohistochemical images of collagen I (A) and collagen III (B) of wounds in four groups on day 4, 7, 14 and 21 (I-Control, II-DECM, III-DECM-2MSN, IV-DECM-2MSN/Rg3, scale bar = 40  $\mu$ m).

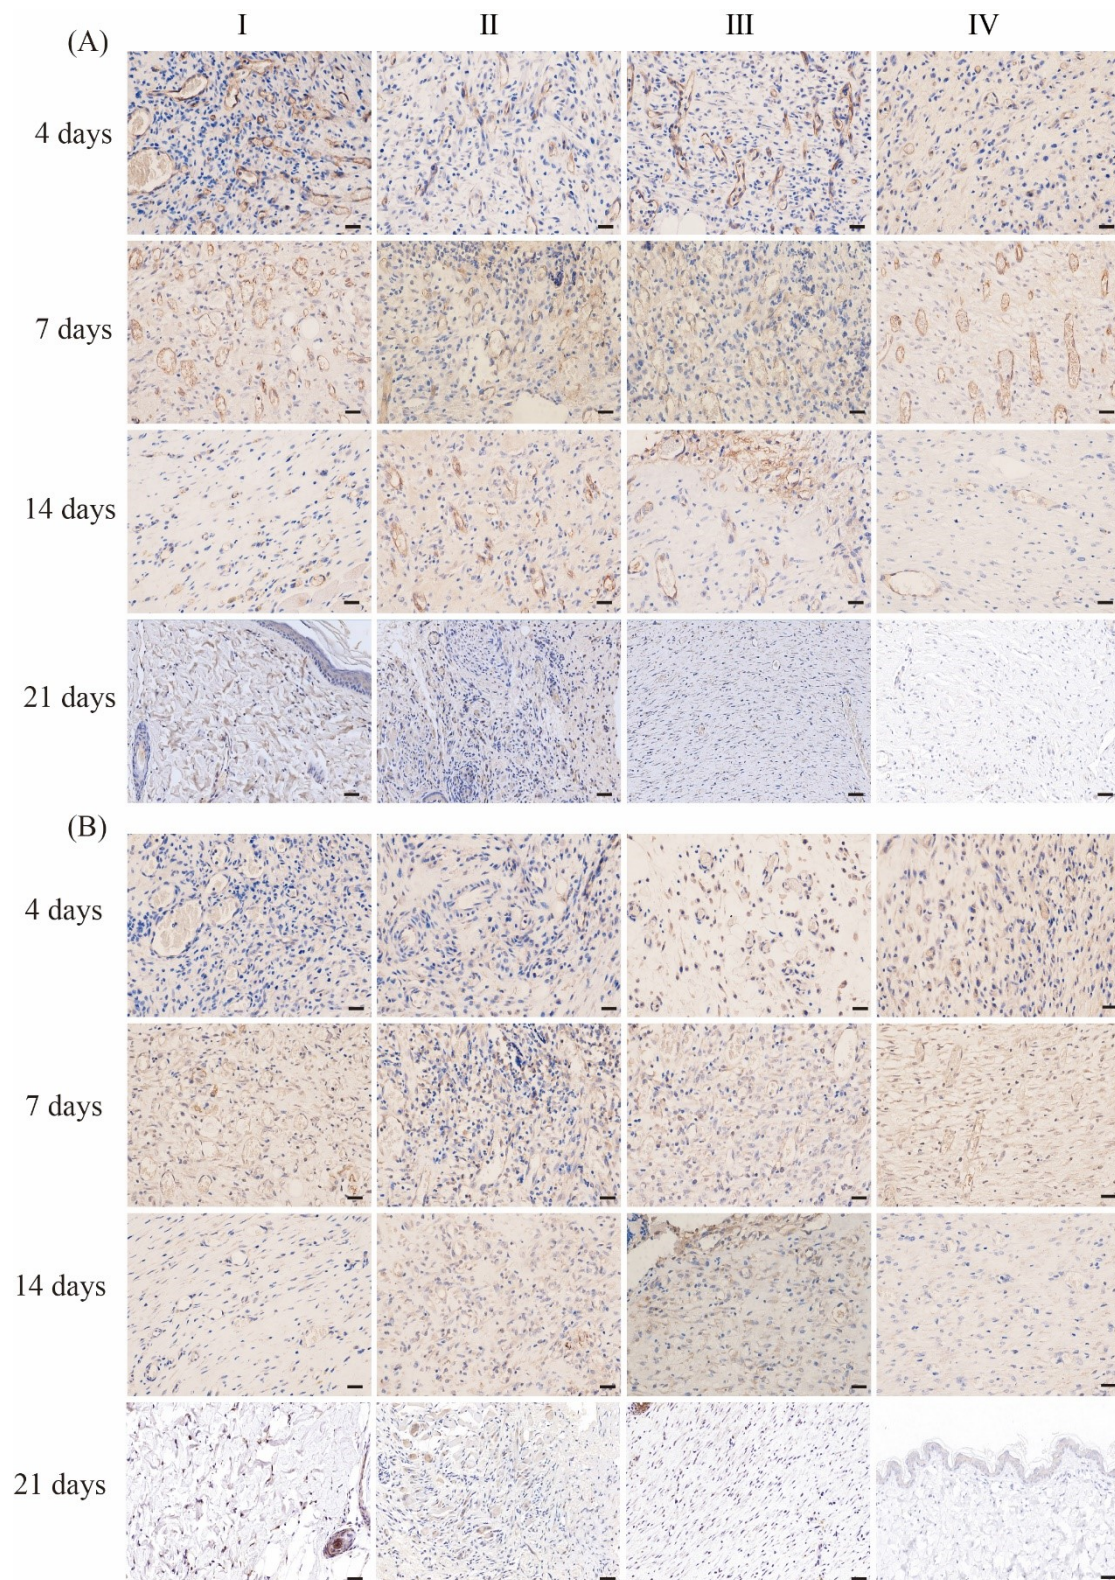

**Figure S3.** Representative immunohistochemical images of CD31 (A) and VEGF (B) of wounds in four groups on day 4, 7, 14 and 21. (I-Control, II-DECM, III-DECM-2MSN, IV-DECM-2MSN/Rg3, scale bar =40  $\mu$ m).
